# Supplementary material for: An atypical phosphodiesterase capable of degrading haloalkyl phosphate diesters from Sphingobium sp. strain TCM1
Source: PubMed Central journal article supplement (PMC5460133; doi:10.1038/s41598-017-03142-9), 2017-06-06
Supplement: 41598_2017_3142_MOESM1_ESM.pdf [file 41598_2017_3142_MOESM1_ESM.pdf]

## Supplementary Information

An atypical phosphodiesterase capable of degrading haloalkyl phosphate diesters from  
*Sphingobium* sp. strain TCM1

Katsumasa Abe<sup>1</sup>, Naoko Mukai<sup>1</sup>, Yuka Morooka<sup>1</sup>, Takeshi Makino<sup>1</sup>, Kenji Oshima<sup>2</sup>,  
Shouji Takahashi<sup>1</sup>, Yoshio Kera<sup>1,\*</sup>

<sup>1</sup>Department of Bioengineering, Nagaoka University of Technology, Nagaoka, Niigata,  
Japan

<sup>2</sup>Department of Biological and Chemical Systems Engineering, National Institute of  
Technology, Kumamoto College, Yatsushiro, Kumamoto, Japan

\*Address correspondence to Yoshio Kera, [yoshkera@vos.nagaokaut.ac.jp](mailto:yoshkera@vos.nagaokaut.ac.jp)

**Table S1** PDE and PME activities during purification step

| Step                           | Total activity                          |              | B <i>p</i> NPP/ <i>p</i> NPP |
|--------------------------------|-----------------------------------------|--------------|------------------------------|
|                                | ( $\mu\text{mol}\cdot\text{min}^{-1}$ ) |              |                              |
|                                | B <i>p</i> NPP                          | <i>p</i> NPP |                              |
| Cell-free extract              | 463                                     | 1253         | 0.4                          |
| Ammonium sulfate fractionation | 366                                     | 1007         | 0.4                          |
| Phenyl Sepharose HP            | 251                                     | 79.0         | 3.2                          |
| Q Sepharose HP                 | 94.9                                    | 29.7         | 3.2                          |
| Superdex 200 pg                | 68.4                                    | 17.4         | 3.9                          |

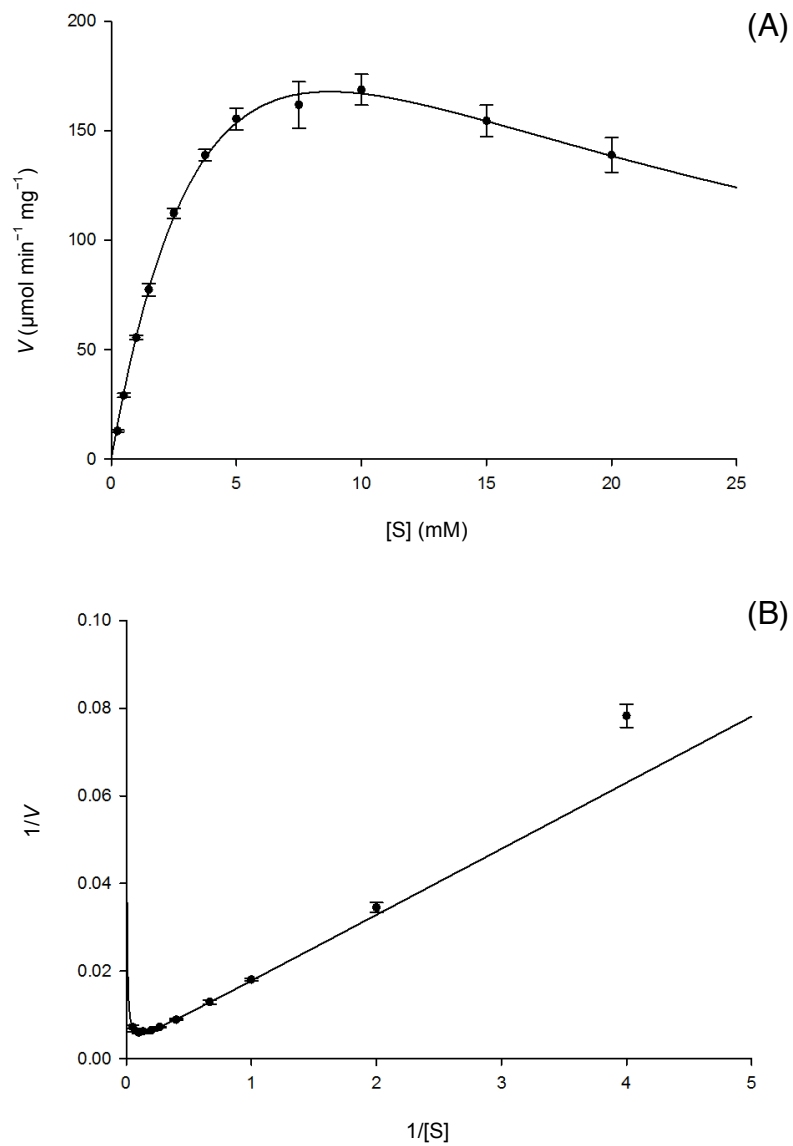

**Figure S1** Effect of substrate concentration on the PDE activity (A) and Lineweaver-Burk plot (B) of PDE activity.  $V$  and  $[S]$  indicate velocity and substrate concentration, respectively. The data are means  $\pm$  standard error (SE) from three independent experiments

|                 |     |                                                                                                                                                           |                                  |
|-----------------|-----|-----------------------------------------------------------------------------------------------------------------------------------------------------------|----------------------------------|
|                 |     | ▼▼▼                                                                                                                                                       |                                  |
| <i>Lla</i> -HPP | 1   | MSLKKLDYHFHSHFSADSEELP-----                                                                                                                               |                                  |
| <i>Sb</i> -PDE  | 55  | --IFAGDL <sup>H</sup> ITVFS <sup>D</sup> GS <sup>A</sup> WPT-----                                                                                         |                                  |
| <i>Bce</i> -HPP | 1   | ---MKVDYH <sup>I</sup> HLEEGPYS <sup>I</sup> GWLAK <sup>I</sup> INESLQHYEPLKEEKHSMEWLVKIQERLQRRVNEGP                                                      |                                  |
| <i>Bwe</i> -HPP | 1   | ---MKVDYH <sup>I</sup> HLEEGPYS <sup>I</sup> GWLAK <sup>I</sup> INDALQYFEPLKEEKHSMEWLMKTQERLQRRVKEGP                                                      |                                  |
| <i>Mca</i> -HPP | 1   | ---MKVDFH <sup>I</sup> HLEEGPYTNNFNK <sup>I</sup> ITSIDTVKGIQAT-HTLDDIERKAQLFNERMEKGD                                                                     |                                  |
| <i>Tth</i> -HPP | 1   | ---MVDSHVHTPLCGHAEGHP-----                                                                                                                                |                                  |
| <i>Bsu</i> -HPP | 1   | ---MQKRDGHIHTPF <sup>C</sup> PHGSNDT-----                                                                                                                 |                                  |
|                 |     | * * *                                                                                                                                                     |                                  |
|                 |     | ▼                                                                                                                                                         |                                  |
| <i>Lla</i> -HPP | 23  | -----RKHVTEAIAHGLEE <sup>I</sup> CFTEHRD-----                                                                                                             | FYFPGMD                          |
| <i>Sb</i> -PDE  | 75  | -----LRLAEA <sup>A</sup> HD <sup>L</sup> KFVSFT <sup>E</sup> ED <sup>I</sup> IT-----                                                                      | PKIRDTGT                         |
| <i>Bce</i> -HPP | 58  | FTTKWIDLYLEEALRKG <sup>I</sup> KEVGI <sup>V</sup> DHLYRFYEAK <sup>E</sup> EY <sup>E</sup> KY <sup>V</sup> DI <sup>S</sup> DSGLGRLQKEWLDQVR                |                                  |
| <i>Bwe</i> -HPP | 58  | FTAKWIDLYLEEAVRKG <sup>I</sup> KEVGI <sup>V</sup> DHLYRFHEAK <sup>G</sup> Y <sup>E</sup> EY <sup>E</sup> KY <sup>V</sup> DI <sup>S</sup> DSRLGRLQKEWLDQVR |                                  |
| <i>Mca</i> -HPP | 57  | YSEWLDLYLEMSLQKGLKQVGI <sup>V</sup> DHLYRFQETRNYFLKYMDVSDTDLGCRQREWLNQVM                                                                                  |                                  |
| <i>Tth</i> -HPP | 19  | ---EAYLEEARAKGLKGVV <sup>F</sup> TDHSP-----                                                                                                               | MPPWYDPESR                       |
| <i>Bsu</i> -HPP | 21  | ---LRQYAE <sup>E</sup> ALKKGFES <sup>I</sup> TFTEHAP-----                                                                                                 | LPPSFTDPTPLKDSAM                 |
|                 |     | : . * : : : . *                                                                                                                                           |                                  |
|                 |     | ▼                                                                                                                                                         |                                  |
| <i>Lla</i> -HPP | 52  | FSLNLPEYFQEINQLQAEFKDKIKIKIGLEMGIDLRFKSEINQFIDSA--PFDFVIASVH                                                                                              |                                  |
| <i>Sb</i> -PDE  | 106 | NKNRSYEIGRAFISSGMLGLGGMKLSLGS <sup>I</sup> ITRAIGHFNCHFLKDANA-----                                                                                        | LNP <sup>G</sup> KV <sup>H</sup> |
| <i>Bce</i> -HPP | 118 | VASLHDFTKAIEEAKERWSKRGVTLKLGIEADYF <sup>I</sup> GGEQQLQSLALG--DFDYVIGSVH                                                                                  |                                  |
| <i>Bwe</i> -HPP | 118 | VTSIYDFTKAIIEAKERWSKRGITLKLGIADYF <sup>I</sup> EGEQELKGLLALG--DFDYVIGSVH                                                                                  |                                  |
| <i>Mca</i> -HPP | 117 | THKMDDFVTFINSQKEKWDKAGVELKLGIEADYF <sup>I</sup> GGEEELKSLAPY--EFDYIIGSVH                                                                                  |                                  |
| <i>Tth</i> -HPP | 51  | MRLEALPFYLLALERV <sup>R</sup> ERAQDLVYVIGLEADFH <sup>P</sup> GTEGFLAQLLRRY--PFDYVIGSVH                                                                    |                                  |
| <i>Bsu</i> -HPP | 60  | AGASLERYIHEISGLKKEYRQGLSIR <sup>T</sup> GLEVDYIAEFDEITLFLD <sup>T</sup> YGPYLD <sup>S</sup> ILSVH                                                         |                                  |
|                 |     | : : * * : * *                                                                                                                                             |                                  |
|                 |     | ▼                                                                                                                                                         |                                  |
| <i>Lla</i> -HPP | 110 | EIGDIE-----VYDG--TEFYLQKTKEEAQREYLLACL <sup>D</sup> VVQNFENYNSFGHLDY                                                                                      |                                  |
| <i>Sb</i> -PDE  | 161 | YS-----TFKQTGGQLRVDWNRTSADEKDL <sup>E</sup> ARF <sup>R</sup> EAKRQGA <sup>I</sup> CQWN <sup>H</sup> PT <sup>I</sup>                                       |                                  |
| <i>Bce</i> -HPP | 176 | FLNGWG-----FDNLISACGSI <sup>E</sup> AVYEQYYS <sup>I</sup> YSSIVASLGVYKPKRVGHITL                                                                           |                                  |
| <i>Bwe</i> -HPP | 176 | FIDGWG-----FDNPD <sup>T</sup> KEYFKEHDL <sup>Y</sup> ALYD <sup>T</sup> FFKTVECAVRSE <sup>L</sup> FD <sup>I</sup> IAHL <sup>D</sup> N                      |                                  |
| <i>Mca</i> -HPP | 175 | FNHWG-----FDNPD <sup>T</sup> KEYFG <sup>T</sup> HELHT <sup>L</sup> YHT <sup>F</sup> FATVESAVRSE <sup>L</sup> FD <sup>I</sup> IAHL <sup>D</sup> N          |                                  |
| <i>Tth</i> -HPP | 109 | YLGAWP-----LDHPELENKFNEYDLV <sup>K</sup> LYD <sup>H</sup> FN <sup>T</sup> VIKAAESGIF <sup>S</sup> IAHL <sup>D</sup> N                                     |                                  |
| <i>Bsu</i> -HPP | 120 | FLRTDSSYLCLDYDEHTFKEPDHQEEYAWRDLKEVFRAYFQ <sup>E</sup> VEKAARSGLFHAIGHLDL                                                                                 |                                  |
|                 |     | * * *                                                                                                                                                     |                                  |
|                 |     | ▼                                                                                                                                                         |                                  |
| <i>Lla</i> -HPP | 158 | VARYGPYTDKSIKFAENREILFEILRALASKEKALEINT-RLFDDPKTEQFYSDLLINFK                                                                                              |                                  |
| <i>Sb</i> -PDE  | 207 | PSSSPG-----EAVTPFLERMFSEGLLSGIEVAQSD-----                                                                                                                 | FIHPSAMDVA                       |
| <i>Bce</i> -HPP | 225 | IKVFN----YRLDENEQISYYKKIARALVETNTATEINAGLYRYPVREMCPSPLYLQVL                                                                                               |                                  |
| <i>Bwe</i> -HPP | 225 | IKVFN----YRLDENEQLSYYKEIARALVETNTATEINAGLYRYPVREMCPSPLYLQVL                                                                                               |                                  |
| <i>Mca</i> -HPP | 224 | LKVFN----YRPEEALLIPL <sup>Y</sup> EQVAEALAKNDVATEVNVGLKYRYPVKEQCPSERFIKVL                                                                                 |                                  |
| <i>Tth</i> -HPP | 158 | PKKFG----HRLPEEALLEAL <sup>E</sup> PALRAVAEAGLFDVNT-AGLRRPAKEVYPAPALLRRA                                                                                  |                                  |
| <i>Bsu</i> -HPP | 280 | VQKFIK-LFPYSMSEHIRGLVSLCLNAIEENGMELDFNTSGLR <sup>K</sup> TYAGGIYIEDWMLNEA                                                                                 |                                  |
|                 |     | * * *                                                                                                                                                     |                                  |
|                 |     | ▼▼                                                                                                                                                        |                                  |
| <i>Lla</i> -HPP | 217 | RLGGKFITLGTDSHIAKRDWLSIHKARTLIKKAGFHELATFSGMKIDKNKKS <sup>I</sup> EKELAA                                                                                  |                                  |
| <i>Sb</i> -PDE  | 249 | LKYNLYIAATTD <sup>A</sup> LGTALEQEAAGMDHRVATLFLTQGEDEAAFKDALEKRR <sup>T</sup> VGLFRD-                                                                     |                                  |
| <i>Bce</i> -HPP | 281 | AKHEVPI <sup>T</sup> LSSDAHYPNDLGKYVEENIKTLRNH <sup>D</sup> IAHLATFT--KRVRTMRLL <sup>E</sup> EV <sup>T</sup> ISK                                          |                                  |
| <i>Bwe</i> -HPP | 281 | AKHGVP <sup>I</sup> LSSDAHYPNDLGKYVEENIKTLRNH <sup>D</sup> ISHIATFT--KRVRTMRLL <sup>E</sup> EEV <sup>I</sup> IS                                           |                                  |
| <i>Mca</i> -HPP | 280 | SEYDVKFTTSSDSHFPHDIGIYNDEIRNLLKRN <sup>G</sup> VKSIVTFS--KMKREEKDIKSIH--                                                                                  |                                  |
| <i>Tth</i> -HPP | 213 | RELGI <sup>L</sup> VLGSDAHRPEEVGFAP <sup>E</sup> VQALLAGLGFREAYYFV--EGSPVAYPLSRAS--                                                                       |                                  |
| <i>Bsu</i> -HPP | 239 | KQKKIPLVFGSDAHQAGDVGYAYEAFLERC-----                                                                                                                       |                                  |
|                 |     | : . : * * *                                                                                                                                               |                                  |
| <i>Lla</i> -HPP | 277 | LE                                                                                                                                                        |                                  |
| <i>Sb</i> -PDE  | --  |                                                                                                                                                           |                                  |
| <i>Bce</i> -HPP | 339 | --                                                                                                                                                        |                                  |
| <i>Bwe</i> -HPP | 339 | K-                                                                                                                                                        |                                  |
| <i>Mca</i> -HPP | --  |                                                                                                                                                           |                                  |
| <i>Tth</i> -HPP | --  |                                                                                                                                                           |                                  |
| <i>Bsu</i> -HPP | --  |                                                                                                                                                           |                                  |

**Figure S2** Amino acid sequence alignment of PHP domain of *Sb*-PDE (Ile55-Asp307) with L-histidinol phosphate phosphatase (HPP) from various organisms. *Lla*,

*Lactococcus lactis* subsp. *lactis* II1403 (accession no. NP\_267372); *Bce*, *Bacillus cereus* (WP\_000861821); *Bwe*, *B. weihenstephanensis* (WP\_078175627); *Mca*, *Micrococcus caseolyticus* (WP\_012656252); *Tth*, *T. thermophilus* (WP\_011227864); and *Bsu*, *B. subtilis* (WP\_021480315). Identical residues and amino acid substitutions with low and high similarities are indicated by asterisks, and dots and double dots, respectively. Histidine, glutamate and aspartate residues which are metal coordination residues of L-histidinol phosphate phosphatase from *Lactococcus lactis* subsp. *lactis* II1403 are indicated by triangles. Putative metal coordination residues of *Sb*-PDE are shown in reverse letters.
